# Supplementary material
Source: publisher figshare collection journal article supplement (https://geolsoc.figshare.com/ndownloader/files/12799142)
Supplement: Supplementary file 1 [file 12799142]

## Sheet: Tephra Supplementary Table
Locality	Sample	Field observations		Grainsize(1)				Glass morphology	Crystals	Glass chemistry (wt%)														Correlation	40Ar/39Ar dating (Ma)
		Thickness (cm)	Colour and notes	Folk (1954)	White and Houghton (2006)	median (phi)	sorting (phi)			mean, SD [n]	SiO2	TiO2	Al2O3	FeOT	MnO	MgO	CaO	Na2O	K2O	P2O5	Cl	sum	A/CNK
Cerro los Quesos	CLQ-T1a*	30	Light grey ash, fining upwards, with abundant coarse biotite decreasing in abundance and size towards the top; characteristic flame-like structures protrude into the overlying finer ash sublayer (fluidization)	bimodal, very poorly sorted, very coarse silt	fine ash	3.89	2.09	high vesiculated shards	bt, sa, pl	mean [6]	76.62	0.04	13.6	0.58	0.09	0.2	0.91	2.9	4.98	0.04	na	99.96	1.15104	-	6.93 ± 0.09
										SD	0.22	0.03	0.09	0.08	0.07	0.12	0.05	0.08	0.32	0.04	-
	CLQ-T9, sublayer T9a*	8	White ash, made only of vesicular glassy clasts, massive	unimodal, moderately sorted fine silt	extremely fine ash	7.39	0.96	na	rare bt	-	na	na	na	na	na	na	na	na	na	na	na	na	na	-	na
										-	-	-	-	-	-	-	-	-	-	-	-
	CLQ-T9, sublayer T9b*	10	Light grey ash with visible fine biotite, normally graded; directly overlies T9a	unimodal, poorly sorted, very fine sand	fine ash	2.78	1.67	high vesiculated shards	bt, sa, pl	mean [5]	76.61	0.27	13.25	0.94	0.17	0.11	0.64	2.59	5.24	na	na	99.82	1.19413	-	≥ 6.71 ± 0.02
										SD	0.9	0.14	0.8	0.15	0.03	0.07	0.18	0.3	0.35	-	-
	CLQ-T12, sublayer T12a*	20	Light brown to grey ash, overladen by a convoluted upper sublayer	unimodal, poorly sorted, coarse silt	extremely fine ash	5.17	1.05	platy shards; bubble-wall shards	pl, px	mean [18]	61.389	0.94411	14.389	3.422	0.09901	1.03463	2.41	3.62	4.062	0.23213	0.10237	91.7042	0.976612	LB-T7a, b	na
										SD	1.04	0.09	0.22	0.22	0.03	0.1	0.21	0.79	0.18	0.05	0.02
	CLQ-T13b	15	Light grey ash	unimodal, poorly sorted, coarse silt	extremely fine ash	6	1.6	na	bt, feldspar	mean [8]	74.9425	0.04125	14.5938	1.43625	0.02875	0.02875	0.5225	2.9075	5.2875	0.0425	0.11	99.9412	1.27389	LB-T10	na
										SD	0.416782	0.0659951	0.137419	0.173694	0.0584166	0.0813173	0.0960283	0.141093	0.405348	0.0638637	0.0534522
	CLQ-T14	10	Light grey ash	unimodal, poorly sorted, coarse silt	extremely fine ash	5.2	1.6	high vesiculated shards	-	mean [10]	63.927	0.45925	14.806	1.741	0.08186	0.45379	1.11603	3.471	4.573	0.06385	na	90.6928	1.16685	-	na
										SD	0.295562	0.0342932	0.175005	0.0502107	0.0171013	0.0283979	0.0384139	0.643402	0.495739	0.0207479	-
	CLQ-T15	10	Light grey ash	unimodal, poorly sorted, very fine sand	very fine ash	3.7	1.8	platy shards; high vesiculated shards	bt, feldspar	mean [10]	70.272	0.0472	13.03	1.485	0.04478	0.09296	0.57306	3.156	4.577	0.07405	na	93.3521	1.16467	LB-T11	na
										SD	0.868073	0.0261831	0.154272	0.0812746	0.0202079	0.0131113	0.0502188	0.25941	0.191604	0.0319044	-
	CLQ-T16	30	Light grey ash	bimodal, very poorly sorted, very coarse silt	extremely fine ash	4.5	2.2	bubble-wall and platy shards; high vesiculated and stretched shards	bt, feldspar	mean [10]°	63.835	0.49315	14.69	1.90125	0.093725	0.47505	1.17239	4.1375	4.68875	0.0890875	na	91.5759	1.04831	LB-T8	na
										SD	1.12811	0.0326512	0.390275	0.125064	0.0505045	0.0478915	0.097626	0.787433	0.291667	0.0262449	-
	CLQ-T17	10	Light grey-brownish ash	unimodal, poorly sorted, very coarse silt	extremely fine ash	4.4	1.2	bubble-wall shards; high vesiculated shards	bt	mean [9]	66.256	0.45679	14.655	1.80145	0.10631	0.44593	1.14797	4.412	4.888	0.07904	0.15	94.3985	1.00131	LB-T15	na
										SD	2.9821	0.135541	0.934395	0.404859	0.0305482	0.138989	0.267521	0.485771	0.236446	0.0330743	0.01
	CLQ-T21*	20	Light grey ash, massive	unimodal, very poorly sorted, very coarse silt	very fine ash	3.89	2.01	high vesiculated and stretched shards; shards with microlites	bt, feldspar	mean [10]	66.277	0.52971	14.042	1.973	0.09018	0.46501	1.22522	4.039	4.504	0.06942	0.14733	93.3619	1.02145	LB-T17	na
										SD	0.79	0.08	0.24	0.24	0.02	0.07	0.17	0.62	0.15	0.05	0.02
	CLQ-T23	10	Light grey ash	unimodal, poorly sorted, coarse silt	extremely fine ash	4.9	1.6	bubble-wall shards	bt	mean [14]	74.1372	0.0392202	16.0817	0.4453	0.0842497	0.0182899	0.211077	4.16256	4.11766	0.702732	na	100	1.37588	LB-T19A	na
										SD	0.650746	0.0223395	0.232336	0.0575881	0.0297004	0.0114803	0.024388	0.110123	0.795097	0.0464216	-
	CLQ-T32	10	Light grey ash	unimodal, very poorly sorted, very fine sand	very fine ash	3.3	2.1	na	bt	mean [3]	73.6567	0.28	15.49	1.13	0.163333	0.39	0.753333	3.29667	4.71333	0	0.12	99.9933	1.30228	-	na
										SD	0.104083	0.101489	0.225389	0.0866025	0.061101	0.166433	0.064291	0.17673	0.357258	0	0.02
	CLQ-T43	3	Dark grey ash	na	na	na	na	low vesiculated shards with microlites	pl	mean [10]	64.024	1.356	16.946	5.496	0.086	1.908	4.094	1.992	3.978	0.028	0.086	99.994	1.12775	-	na
										SD	0.432007	0.127004	0.201072	0.115888	0.0804984	0.12276	0.350471	0.421865	0.404191	0.0389872	0.0320936
	CLQ-T44	3	Dark grey ash	na	na	na	na	high vesiculated shards with microlites	pl	mean [10]	55.573	1.37457	15.57	6.849	0.13757	2.604	5.239	3.363	2.228	0.40386	0.0805	93.4225	0.89127	-	na
										SD	1.04973	0.223462	0.675738	1.0931	0.0359717	0.289106	0.530083	0.807892	0.143975	0.0260362	0.0100247
	CLQ-T45	3	Dark grey ash	unimodal, poorly sorted, coarse silt	extremely fine ash	5	1.4	low vesiculated shards with microlites	pl	mean [8]	58.3388	0.85935	15.3688	3.59875	0.121413	1.2426	2.87375	3.01125	3.43125	0.298088	0.137488	89.2814	1.10625	-	na
										SD	0.635058	0.123428	0.34436	0.461657	0.0405367	0.174768	0.336874	0.787608	0.720267	0.079984	0.0165639
	CLQ-T49*	25	Light grey ash, with very abundant coarse biotite, in normally graded sublayers	unimodal, very poorly sorted, very coarse silt	very fine ash	4.11	2.02	bubble-wall shards; high vesiculated shards	bt, sa, pl	mean [5]	77.8	0.176	12.758	0.764	0.048	0.082	0.958	2.602	4.66	0.014	0.14	100.002	1.15289	-	7.55 ± 0.05
										SD	0.102956	0.126214	0.132174	0.11327	0.066106	0.0584808	0.0875785	0.134611	0.183848	0.031305	0.04
Cerro los Quesos west	CLQ15-T4	-	White ash with visible biotite	bimodal, poorly sorted, very coarse silt	extremely fine ash	4.9	2	na	bt	-	na	na	na	na	na	na	na	na	na	na	na	na	na	-	na
										-	-	-	-	-	-	-	-	-	-	-	-
	CLQ15-T5	-	Grey ash	unimodal, poorly sorted, very fine sand	very fine ash	3.2	1.2	na	bt	-	na	na	na	na	na	na	na	na	na	na	na	na	na	-	na
										-	-	-	-	-	-	-	-	-	-	-	-
	ANF-T4	-	Light grey ash with visible fine biotite	unimodal, poorly sorted, very coarse silt	extremely fine ash	4.3	1.4	bubble-wall shards; high vesiculated shards	bt, feldspar, px	mean [10]	70.068	0.182	12.751	1.06337	0.03836	0.14491	0.64606	3.431	4.864	0.02152	na	93.2102	1.05524	-	na
										SD	0.144822	0.0324992	0.113181	0.0735545	0.0191236	0.0240934	0.015107	0.125561	0.168997	0.0256206	-
	CAMPO-T-P2	-	Light grey ash with visible fine biotite	unimodal, poorly sorted, coarse silt	extremely fine ash	4.9	1.3	na	bt, feldspar	-	na	na	na	na	na	na	na	na	na	na	na	na	na	-	na
										-	-	-	-	-	-	-	-	-	-	-	-
Cerro la Bruja	LB-T2	10	Light grey ash with scattered yellowish and reddish coarse clasts	bimodal, poorly sorted, very coarse silt	very fine ash	4	1.7	na	bt	-	na	na	na	na	na	na	na	na	na	na	na	na	na	-	na
										-	-	-	-	-	-	-	-	-	-	-	-
	LB-T3	10	Light grey ash with scattered yellowish and reddish coarse clasts	unimodal, poorly sorted, very coarse silt	very fine ash	4	1.3	na	bt	-	na	na	na	na	na	na	na	na	na	na	na	na	na	-	na
										-	-	-	-	-	-	-	-	-	-	-	-
	LB-T7A	5	Grey to light brown, convoluted	na	na	na	na	bubble-wall shards	pl	mean [17]	61.5178	0.947689	14.6	3.51	0.103122	1.04379	2.43	3.27556	3.95556	0.1886	0.115256	91.6873	1.03633	CLQ-T12	na
										SD	0.76	0.05	0.22	0.35	0.02	0.13	0.29	0.73	0.21	0.04	0.02
	LB-T7B	10	Grey to light brown, convoluted	na	na	na	na	bubble-wall shards; low vesiculated shards	pl	mean [22]	61.9288	1.03778	14.6975	3.725	0.0880625	1.17484	2.5675	4.28	4.08625	0.307438	0.09555	93.9887	0.911081	CLQ-T12	na
										SD	0.79	0.06	0.19	0.25	0.03	0.11	0.19	0.51	0.37	0.06	0.01
	LB-T8	5	Light grey ash with visible fine biotite	bimodal, very poorly sorted, very coarse silt	extremely fine ash	4.4	2	bubble-wall shards; high vesiculated and stretched shards	bt	mean [10]°	64.82	0.486629	14.6671	1.82857	0.102471	0.457743	1.1404	4.10429	4.67143	0.0783571	na	92.357	1.0566	CLQ-T16	na
										SD	0.448553	0.0155815	0.125395	0.0659365	0.0193775	0.0288326	0.0456005	0.587391	0.200119	0.0294001	-
	LB-T9	20	Light grey ash	unimodal, poorly sorted, coarse silt	extremely fine ash	5.6	1.4	bubble-wall shards; high vesiculated shards; shards with microlites	rare bt	mean [10]	66.136	0.55534	14.441	1.90869	0.08865	0.45986	1.21486	3.474	4.462	0.1304	0.13907	93.0099	1.13233	-	na
										SD	3.16875	0.291976	1.33893	0.805127	0.0260779	0.279713	0.654613	0.938938	0.520231	0.119771	0.032661
	LB-T10	8	White ash, massive	unimodal, poorly sorted, coarse silt	extremely fine ash	5.2	1.7	bubble-wall shards; low vesiculated shards	bt	mean [10]	69.5675	0.0179	13.135	1.29042	0.0417125	0.0408375	0.444012	3.5	4.73	0.127337	na	92.8947	1.12413	CLQ-T13b	na
										SD	0.622133	0.0213358	0.243134	0.33797	0.0164461	0.0280979	0.0666642	0.189435	0.181187	0.0170577	-
	LB-T11	10	Light grey ash, with abundant bt	bimodal, very poorly sorted, very fine sand	very fine ash	3.2	2.1	platy shards; high vesiculated shards	bt, feldspar	mean [26]	69.697	0.05459	13.861	1.42079	0.049325	0.09064	0.82709	3.25	4.2619	0.082495	na	93.5948	1.20917	CLQ-T15	7.45 ± 0.01
										SD	1.96952	0.0291	2.41776	0.288035	0.0276142	0.029158	0.999071	1.08099	0.840276	0.0262993	-
	LB-T15	10	Light grey-brownish ash	unimodal, poorly sorted, very coarse silt	very fine ash	4	1.1	bubble-wall shards; high vesiculated shards	bt	mean [9]	66.603	0.42325	14.81	1.841	0.09733	0.42178	1.11792	4.215	5.016	0.08091	0.14561	94.7718	1.02878	CLQ-T17	na
										SD	1.15091	0.135884	0.607399	0.186217	0.0308411	0.120006	0.213769	0.496504	0.35979	0.0183261	0.0176408
	LB-T17	20	White-light grey ash, massive	unimodal, poorly sorted, very coarse silt	extremely fine ash	4.6	1.9	high vesiculated shards	rare bt	mean [15]	72.0078	0.573298	14.2229	2.17247	0.0856764	0.523807	1.4253	3.9907	4.90279	0.0952201	na	100	0.983394	CLQ-T21	na
										SD	0.356319	0.0179868	0.184849	0.0811287	0.0223646	0.0312984	0.0739672	0.422083	0.207123	0.0205547	-
	LB-T19A	4	White yellowish ash	unimodal, poorly sorted, very coarse silt	extremely fine ash	4.6	1.5	bubble-wall shards	bt	mean [15]	73.457	0.037956	16.4296	0.450273	0.0779805	0.00972705	0.190972	4.13521	4.50849	0.702768	na	100	1.36575	CLQ-T23	na
										SD	0.760038	0.0193641	0.197488	0.0517882	0.0357088	0.00751747	0.013555	0.171273	0.68885	0.0401798	-
	LB-T30	3	Dark grey ash	unimodal, poorly sorted, coarse silt	extremely fine ash	5.2	1.5	shards with microlites	-	mean [10]	57.608	1.19252	14.662	5.21	0.0878	1.72389	3.833	3.686	3.485	0.46134	0.10532	92.0549	0.872481	-	na
										SD	0.955287	0.0509115	0.45733	0.183242	0.0309908	0.0672129	0.131153	0.673485	0.304968	0.0379376	0.007903
	LB16-T1	-	Light grey-brownish ash with fine biotite	bimodal, very poorly sorted, very coarse silt	extremely fine ash	4.2	2.1	na	bt	-	na	na	na	na	na	na	na	na	na	na	na	na	na	-	na
										-	-	-	-	-	-	-	-	-	-	-	-
Cerros Cadenas de los Zanjones	LA-T31A	-	White ash with visible biotite	bimodal, poorly sorted, very coarse silt	extremely fine ash	4.1	2	na	rare bt	-	na	na	na	na	na	na	na	na	na	na	na	na	na	-	na
										-	-	-	-	-	-	-	-	-	-	-	-
	ZANJ-T13b	-	Light grey ash	unimodal, poorly sorted, coarse silt	extremely fine ash	4.9	1.7	shards with microlites; high vesiculated shards	-	mean [10]	59.295	0.9097	15.834	3.612	0.1359	1.32592	2.753	3.561	3.891	0.31658	0.14521	91.7793	1.05034	-	na
										SD	0.604175	0.109121	0.229308	0.349151	0.0328935	0.139517	0.180988	0.954387	0.250175	0.061541	0.0166446
	ZANJ-T20b	-	Dark grey ash	unimodal, poorly sorted, coarse silt	extremely fine ash	5	1.7	high vesicualted shards; shards with microlites	-	mean [10]	59.473	0.90748	15.306	3.72	0.13122	1.22463	2.656	3.393	4.055	0.34548	na	91.2118	1.0342	-	na
										SD	1.07567	0.0476445	0.173346	0.209284	0.0293963	0.17933	0.324558	0.96933	0.474394	0.0302225	-
	ZANJ-T28	-	White ash with visible biotite	bimodal, very poorly sorted, very fine sand	very fine ash	3.4	2.1	platy shards; low vesiculated shards; bubble-wall shards	bt, feldspar	mean [10]	72.544	0.16485	11.51	0.73855	0.0394	0.11892	0.84709	2.948	4.267	0.01253	0.14038	93.3307	1.04558	-	na
										SD	0.821803	0.025437	0.20221	0.038463	0.0229435	0.0183984	0.0342724	0.109828	0.107088	0.0157588	0.0131099
	ZANJ-T29	-	Dark grey ash	unimodal, poorly sorted, coarse silt	extremely fine ash	4.9	1.4	bubble-wall shards	-	mean [10]	55.1489	1.43203	15.1611	6.72333	0.138644	2.24889	4.62222	3.92556	3.74778	0.732878	na	93.8813	0.801394	-	na
										SD	0.472585	0.054261	0.153415	0.302861	0.0385609	0.202203	0.272111	0.264722	0.227474	0.0524305	-
	ZANJ-T31	-	Dark grey ash	unimodal, poorly sorted, coarse silt	extremely fine ash	5.1	1.4	bubble-wall shards; low vesiculated shards	bt	mean [10]	55.302	1.40896	15.186	6.634	0.12959	2.164	4.395	4.027	3.916	0.71147	na	93.874	0.805442	-	na
										SD	0.70977	0.0812574	0.192654	0.571415	0.0299416	0.25012	0.450956	0.233336	0.270768	0.0703173	-
Cerro Colorado	CC-T17*	10	White ash with visible biotite	bimodal, poorly sorted, coarse silt	extremely fine ash	5.7	1.8	na	bt	-	na	na	na	na	na	na	na	na	na	na	na	na	na	-	na
										-	-	-	-	-	-	-	-	-	-	-	-
	CC-T22b*	-	White ash	unimodal, poorly sorted, very coarse silt	extremely fine ash	4.6	1.9	low vesiculated shards	bt	mean [3]	75.9533	0.143333	13.9267	0.643333	0.1	0.133333	0.803333	3.10667	5.06667	0.0266667	0.0966667	100	1.15523	-	na
										SD	0.200083	0.0550757	0.0493288	0.162583	0.087178	0.135031	0.080829	0.248462	0.173877	0.046188	0.046188
Cerro Toro Chico	TC-T1	10	Light grey ash, with visible biotite	bimodal, poorly sorted, very fine sand	very fine ash	3.2	1.8	na	bt	-	na	na	na	na	na	na	na	na	na	na	na	na	na	-	na
										-	-	-	-	-	-	-	-	-	-	-	-
Cerro Blanco	BL-T1	10	White ash, with visible biotite	unimodal, poorly sorted, very fine sand	very fine ash	3.6	1.4	platy shards; low vesicualted shards	bt, pl, sa	mean [15]	77.9668	0.0671148	12.9012	0.555768	0.033384	0.0503387	0.901748	3.30119	4.19856	0.0239587	na	100	1.11077	LZ.T1	na
										SD	0.673077	0.0195113	0.252266	0.0596347	0.0199157	0.0204656	0.0526246	0.13746	0.628534	0.0239738	-
Cerro Hueco la Zorra	LZ-T1	-	White ash with visible biotite	bimodal, very poorly sorted, coarse silt	extremely fine ash	5.1	2.1	platy shards; high vesicualted shards	bt, feldspar	mean [15]	77.3712	0.0668064	13.1478	0.561039	0.0468488	0.05349	0.899521	3.05632	4.78853	0.00841285	na	100	1.10987	BL-T1	na
										SD	0.64913	0.0149036	0.309327	0.0431278	0.028248	0.0139009	0.06652	0.0937595	0.330054	0.0116895	-
	LZ-T19	-	Light grey ash, with fine biotite	unimodal, poorly sorted, very fine sand	very fine ash	3.3	2	na	bt, feldspar	mean [7]	71.8114	0.112071	14.5986	0.622057	0.0352143	0.0732714	1.72806	3.31	2.56413	0.00867143	na	94.8635	1.28481	-	na
										SD	5.77041	0.0363932	5.35603	0.0929523	0.026711	0.0384489	2.74367	1.52157	1.32203	0.017324	-
Table S1. Field observations, grain-size classification, petrographic composition, EPMA analyses of glass shards and 40Ar-39Ar dating of the P2 sequence tephra samples.
(1)Grain size parameters obtained with Blott S. (2000) Gradistat: A Grain Size Distribution and Statistics Package for the Analysis of unconsolidated sediments by sieving and laser granlometer; Folk, R.L. (1954) The distinction between grain size and mineral composition in sedimentary-rock nomenclature. Journal of Geology, 62, 344-359; White JDL and Houghton BF (2006) Primary volcaniclastic rocks…
Key for the "crystals" column: bt = biotite, sa = sanidine, pl = plagioclase. Numbers between square brackets in the "[n]" column correspond to the number of analysed points.
* Chemical data from Gariboldi et al. (2017)
°Prevalent glass composition (the sample contains shards with exotic composition)
SD: standard deviation
na: not analysed
